# Supplementary material for: System Theoretical Study on the Effect of Variable Nonmetallic Doping on Improving Catalytic Activity of 2D-Ti3C2O2 for Hydrogen Evolution Reaction
Source: MDPI journal article supplement (doi:10.3390/nano11102497), 2021-09-25
Supplement: s1 [file s1]

## Supporting Information

# System Theoretical Study on the Effect of Variable Nonmetallic Doping on Improving Catalytic Activity of 2D-Ti<sub>3</sub>C<sub>2</sub>O<sub>2</sub> for Hydrogen Evolution Reaction

Ye Su <sup>†</sup>, Minhui Song <sup>†</sup>, Xiaoxu Wang <sup>\*</sup>, Jihang Jiang, Xiaolong Si, Tianhang Zhao and Ping Qian <sup>\*</sup>

Beijing Advanced Innovation Center for Materials Genome Engineering, School of Mathematics and Physics, ,  
University of Science and Technology Beijing, Beijing 100083, China; suyechina@163.com (Y.S.);  
mhuisong@163.com (M.S.); xuying13520506589@163.com (J.J.); sixiaolong2018@outlook.com (X.S.);  
ztx13520805687@163.com (T.Z.)

<sup>\*</sup> Correspondence: wxx18811349251@163.com (X.W.); pingqian@ustb.edu.cn (P.Q.)

<sup>†</sup> Ye Su and Minhui Song are co-first authors.

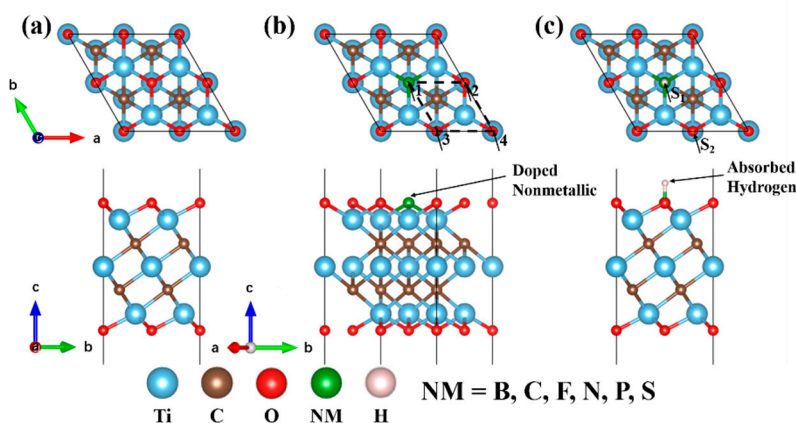

**Figure S1.** 0.25-1.00 concentrations nonmetallic element doping configurations.

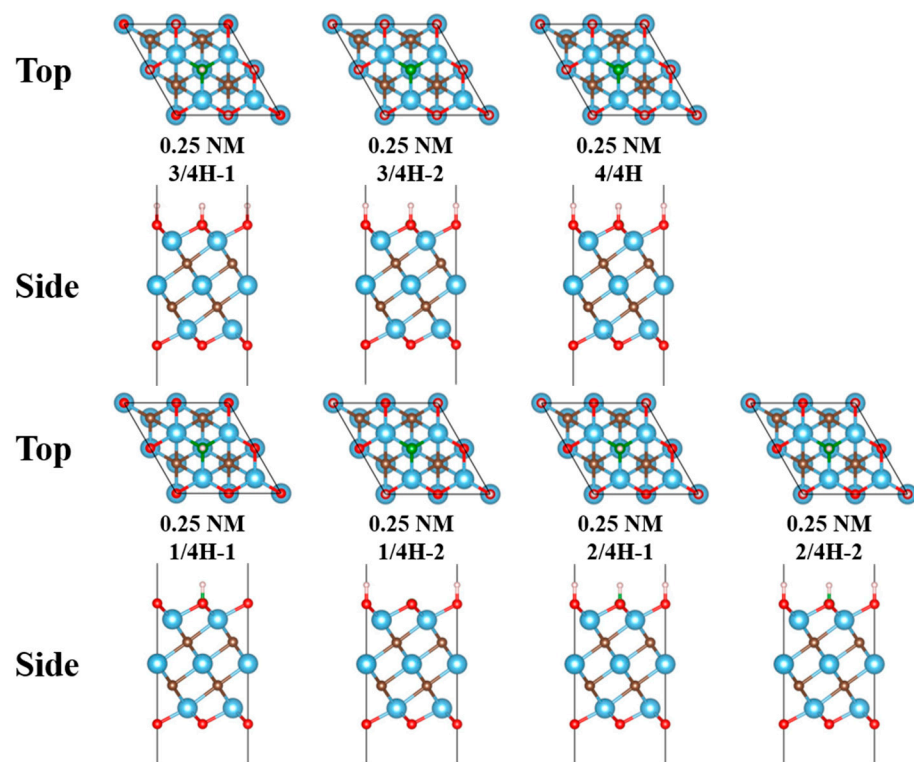

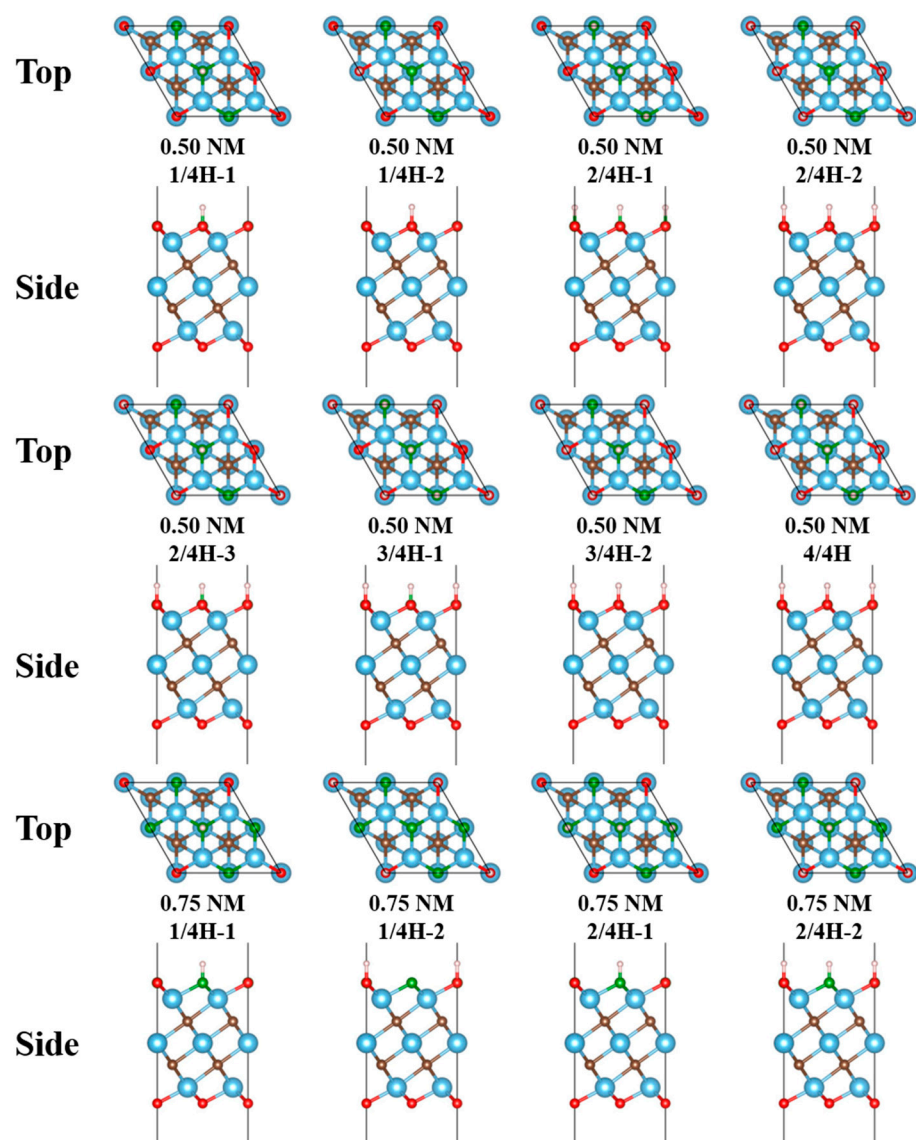

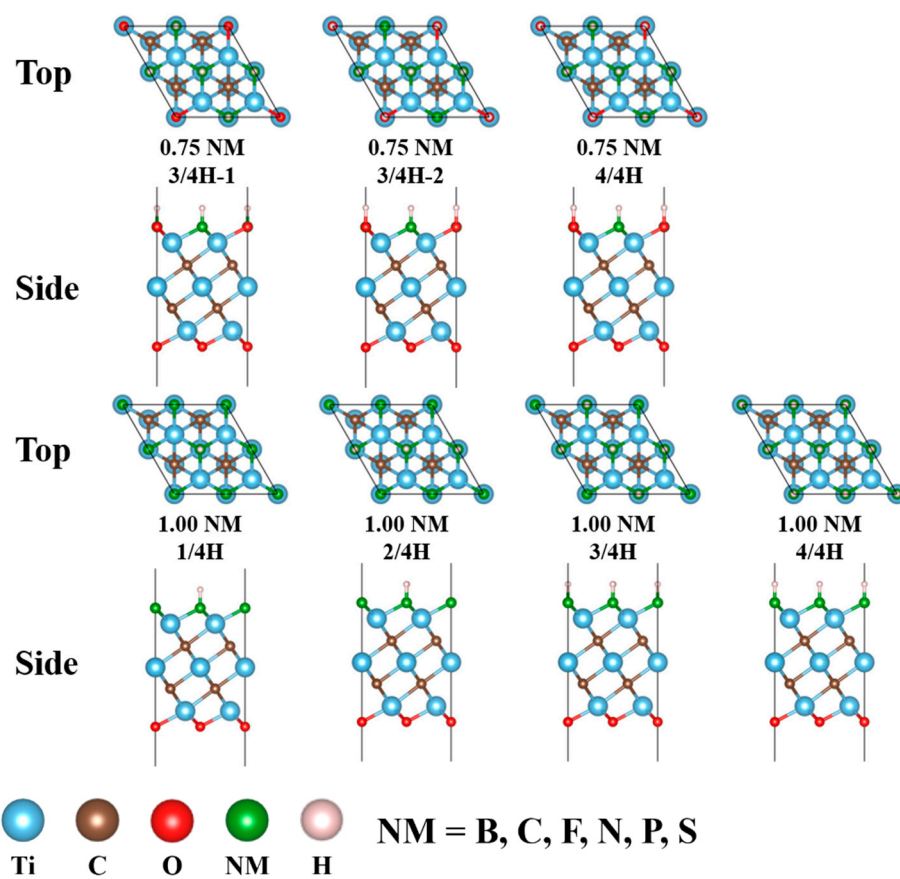

**Figure S2.** Different concentrations nonmetallic element doping at different H absorption concentrations configurations.

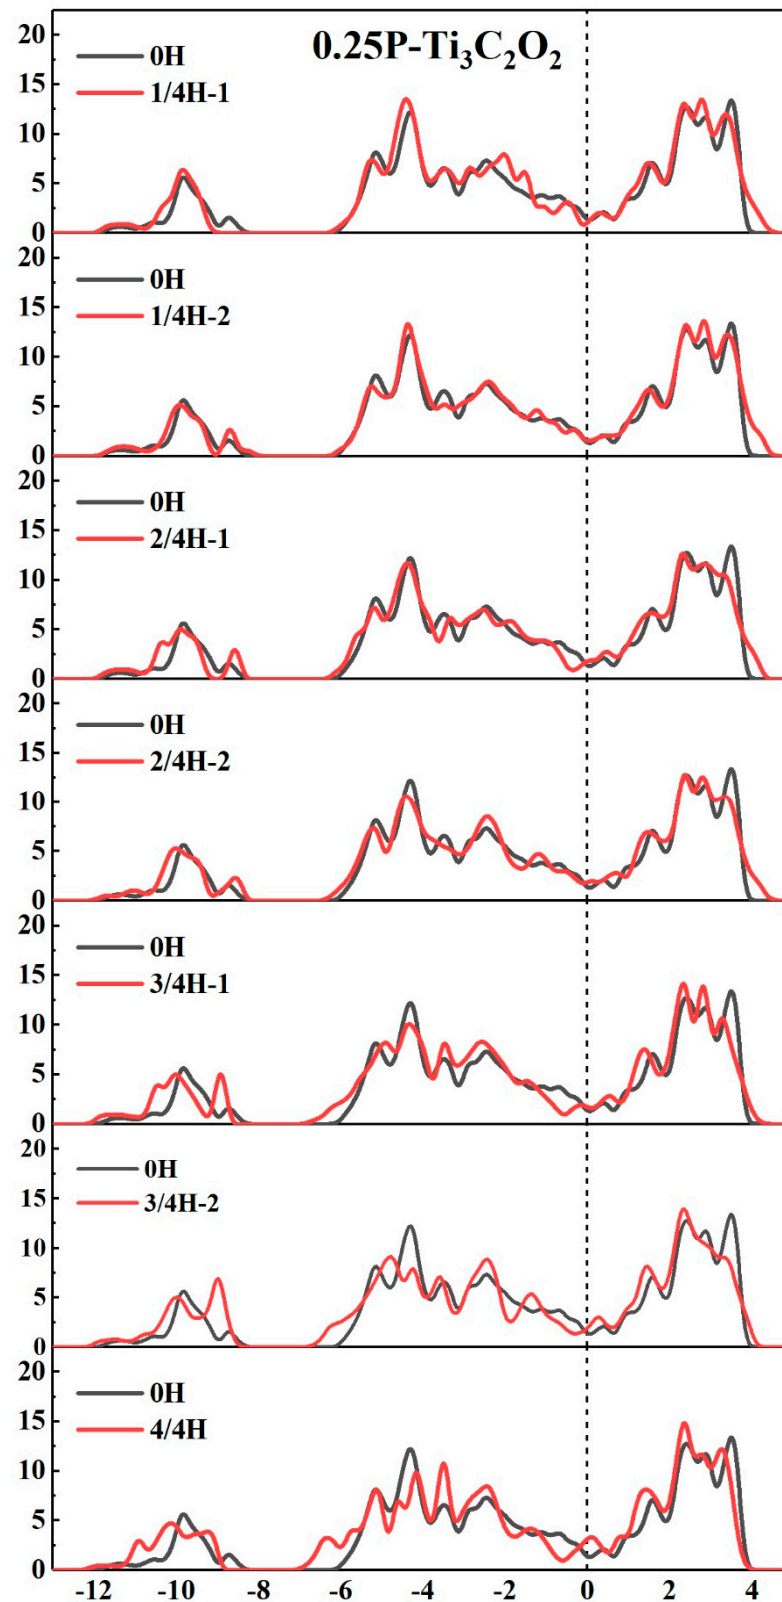

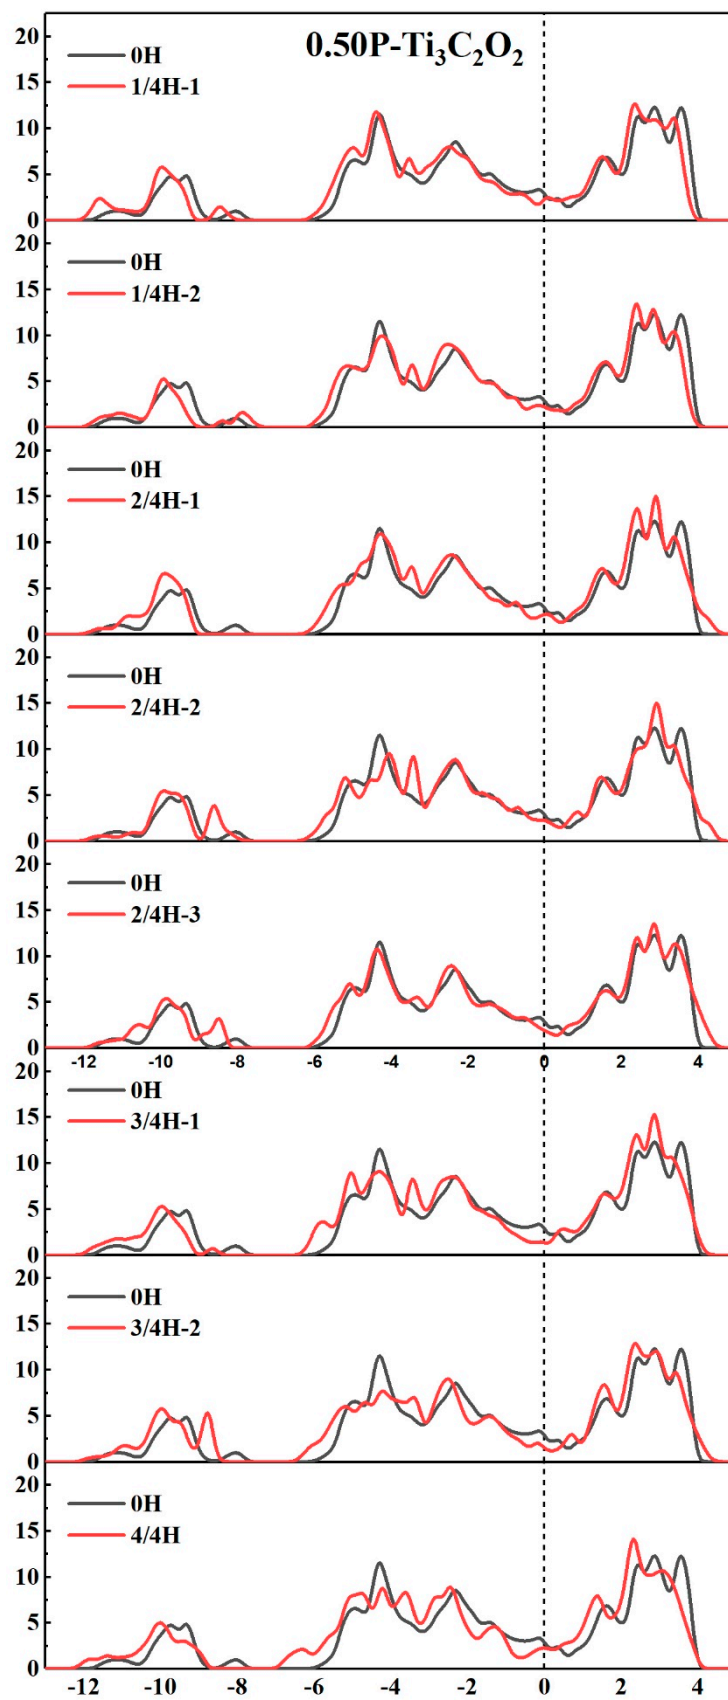

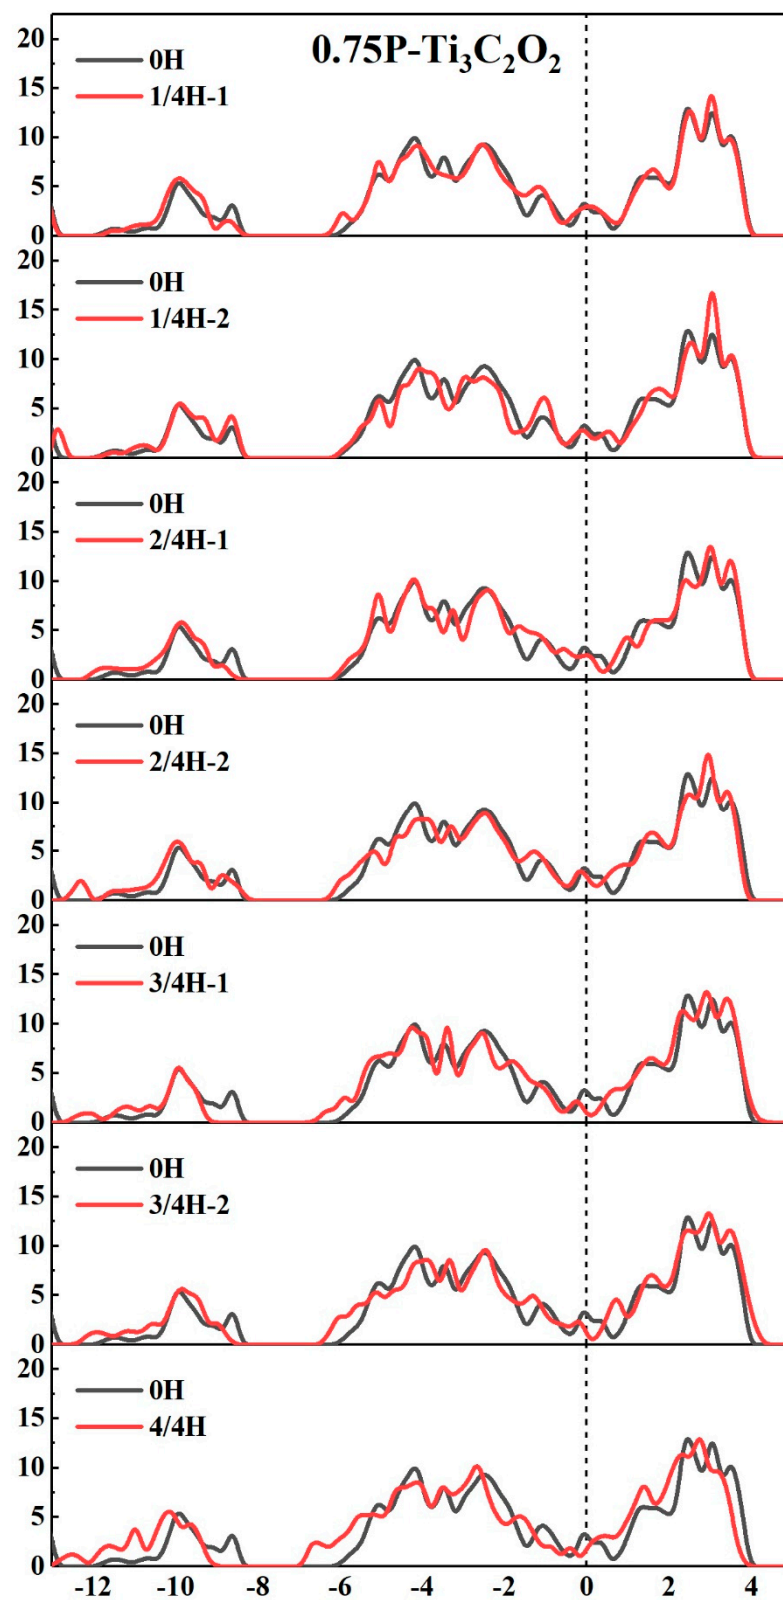



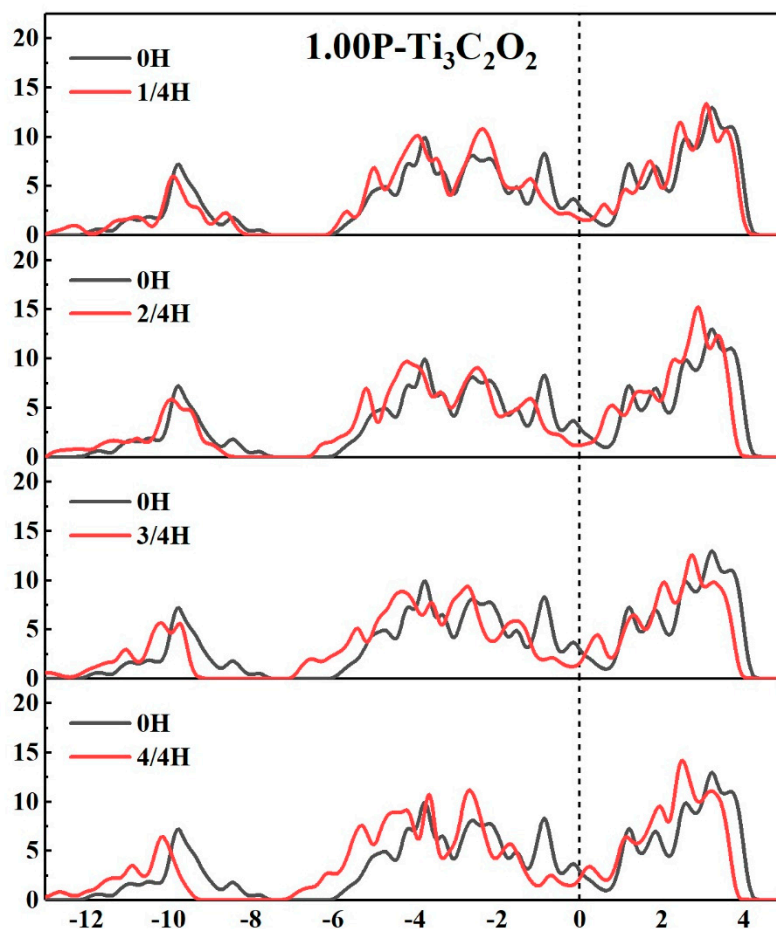

**Figure S3.** TDOS of different concentrations P element at different H element absorption concentrations. The black lines represent H atoms does not absorbed on the surface, the red lines represent H atoms absorbed on the surface.

**Table S1.** The hydrogen adsorption free energy( $\Delta G_H$ ) of nonmetal doping  $Ti_3C_2O_2$ . 1-NM, 2-NM, 3-NM and 4-NM represent 1, 2, 3 and 4 H atoms absorbed on the doping nonmetallic atoms; 1-O, 2-O, 3-O represent 1, 2 and 3 H atoms absorbed on the surface O atoms. Bold values selected in the paper.

| Doping Concentration | H coverage | configuration | $\Delta G(H)/eV$ |        |                |        |        |
|----------------------|------------|---------------|------------------|--------|----------------|--------|--------|
|                      |            |               | C                | F      | Doping Element |        |        |
|                      |            |               |                  |        | N              | P      | S      |
| 25%                  | 1/4        | 1-NM          | -1.387           | -1.532 | -1.035         | -0.377 | 0.552  |
|                      |            | 1-O           | -4.230           | -3.705 | -0.269         | -0.308 | -0.237 |
|                      | 1/2        | 1-NM,1-O      | -0.792           | -3.324 | -0.530         | -0.256 | 0.173  |
|                      |            | 2-O           | -0.271           | -3.324 | -0.089         | -0.205 | -0.112 |
|                      | 3/4        | 1-NM,2-O      | -0.512           | -1.233 | -0.270         | -0.142 | 0.298  |
|                      |            | 3-O           | -0.081           | -3.054 | 0.077          | -0.084 | 0.060  |
|                      | 1          | 1-NM,3-O      | -0.284           | -2.509 | -0.028         | 0.034  | 0.384  |
| 50%                  | 1/4        | 1-NM          | -1.635           | -3.448 | -1.346         | -0.908 | 0.520  |
|                      |            | 1-O           | -0.571           | -3.105 | -0.526         | -0.959 | -0.304 |
|                      | 1/2        | 2-NM          | -1.468           | 0.467  | -1.170         | -0.524 | 0.567  |
|                      |            | 2-O           | -0.441           | 0.466  | -0.314         | -0.349 | -0.635 |
|                      | 3/4        | 1-NM,1-O      | -1.018           | 1.547  | -1.327         | -0.406 | 0.284  |
|                      |            | 2-NM,1-O      | -1.065           | -      | -0.768         | -0.337 | 0.530  |
|                      | 1          | 1-NM,2-O      | -0.724           | 1.151  | -0.458         | -0.303 | 0.314  |
| 75%                  | 1/4        | 2-NM,2-O      | -0.821           | 1.539  | -0.495         | -0.190 | 0.586  |
|                      |            | 1-NM          | -5.521           | 0.488  | -1.854         | 0.149  | 0.556  |
|                      | 1/2        | 1-O           | -4.652           | 0.488  | -0.941         | -0.086 | -0.284 |
|                      | 1/2        | 2-NM          | -5.193           | 2.878  | -1.540         | 0.092  | 0.719  |



|             |            |                 |        |        |        |        |       |
|-------------|------------|-----------------|--------|--------|--------|--------|-------|
| <b>100%</b> |            | <b>1-NM,1-O</b> | -4.719 | 1.507  | -1.124 | 0.076  | 0.278 |
|             | <b>3/4</b> | <b>3-NM</b>     | -5.934 | 1.000  | -      | 0.012  | 0.904 |
|             |            | <b>2-NM,1-O</b> | -5.777 | 2.233  | -1.072 | 0.034  | 0.612 |
|             | <b>1</b>   | <b>3-NM,1-O</b> | -1.233 | 2.011  | -      | 0.117  | -     |
|             | <b>1/4</b> | <b>1-NM</b>     | -6.704 | -0.879 | -2.132 | -0.303 | 3.640 |
|             | <b>1/2</b> | <b>2-NM</b>     | -4.637 | -3.270 | -1.924 | -0.132 | 2.247 |
|             | <b>3/4</b> | <b>3-NM</b>     | -3.363 | -2.432 | -3.222 | 0.008  | 1.927 |
|             | <b>1</b>   | <b>4-NM</b>     | -2.665 | -0.894 | -0.329 | 0.119  | 1.833 |

**Table S2.** Doped structure lattice constant, doping atomic radius and O-H bond length of 2D Ti<sub>3</sub>C<sub>2</sub>O<sub>2</sub> and nonmetal doping Ti<sub>3</sub>C<sub>2</sub>O<sub>2</sub>.

| <b>NM</b> | <b>concentration</b> | <b>a</b> | <b>r</b> | <b>b(NM-Ti)</b> |
|-----------|----------------------|----------|----------|-----------------|
| <b>O</b>  | -                    | 6.028    | 0.740    | 1.968           |
|           | <b>0.25</b>          | 6.055    | 0.810    | 2.204           |
|           | <b>0.5</b>           | 6.060    | 0.810    | 2.209           |
| <b>B</b>  | <b>0.75</b>          | 6.025    | 0.810    | 2.129           |
|           | <b>1</b>             | 6.000    | 0.810    | 2.285           |
|           | <b>0.25</b>          | 6.063    | 0.770    | 1.982           |
| <b>C</b>  | <b>0.5</b>           | 6.080    | 0.770    | 2.016           |
|           | <b>0.75</b>          | 6.072    | 0.770    | 2.013           |
|           | <b>1</b>             | 6.028    | 0.770    | 2.092           |
| <b>F</b>  | <b>0.25</b>          | 6.032    | 0.720    | 2.140           |
|           | <b>0.5</b>           | 6.036    | 0.720    | 2.125           |
|           | <b>0.75</b>          | 6.038    | 0.720    | 2.117           |
| <b>N</b>  | <b>1</b>             | 6.040    | 0.720    | 2.149           |
|           | <b>0.25</b>          | 0.740    | 6.048    | 1.921           |
|           | <b>0.5</b>           | 0.740    | 6.068    | 1.901           |
| <b>P</b>  | <b>0.75</b>          | 0.740    | 6.076    | 1.923           |
|           | <b>1</b>             | 0.740    | 6.093    | 1.937           |
|           | <b>0.25</b>          | 1.100    | 6.071    | 2.393           |
| <b>S</b>  | <b>0.5</b>           | 1.100    | 6.083    | 2.482           |
|           | <b>0.75</b>          | 1.100    | 6.038    | 2.581           |
|           | <b>1</b>             | 1.100    | 6.005    | 2.608           |
|           | <b>0.25</b>          | 1.040    | 6.058    | 2.391           |
|           | <b>0.5</b>           | 1.040    | 6.079    | 2.393           |
|           | <b>0.75</b>          | 1.040    | 6.093    | 2.399           |
|           | <b>1</b>             | 1.040    | 6.114    | 2.392           |
